# Supplementary material
Source: MDPI journal article supplement (https://www.mdpi.com/2076-3417/12/2/564)
Supplement: s1 [file s1]

Case Report

# A Case of Hemophagocytic Lymphohistiocytosis Triggered by Disseminated Tuberculosis and Hairy Cell Leukaemia after SARS-CoV2 Infection

Alessandro Cellini <sup>1,†</sup>, Andrea Visentin <sup>1,2,†</sup>, Massimiliano Arangio Febbo <sup>1</sup>, Susanna Vedovato <sup>1</sup>, Serena Marinello <sup>3</sup>, Ivo Tiberio <sup>4</sup>, Livio Trentin <sup>1,2,\*</sup> and Carmela Gurrieri <sup>1</sup>

- <sup>1</sup> Hematology and Clinical Immunology Unit, Department of Medicine, University of Padua, 35128, Padua, Italy; alessandro.cellini@studenti.unipd.it (A.C.); andrea.visentin@unipd.it (A.V.); massimilianoaf@gmail.com (M.A.F.); susanna.vedovato@gmail.com (S.V.); carmela.gurrieri@unipd.it (C.G.)
  - <sup>2</sup> Veneto Institute of Molecular Medicine, Centro di Eccellenza per la Ricerca Biomedica Avanzata, 35129 Padua, Italy
  - <sup>3</sup> Infective and Tropical Disease Unit, Padua University Hospital, 35128, Padua, Italy; serena.marinello@aopd.veneto.it
  - <sup>4</sup> Anesthesiology and Intensive Care Unit, Padua University Hospital, 35128, Padua, Italy; ivo.tiberio@aopd.veneto.it
- \* Correspondence: livio.trentin@unipd.it; Tel.: +39-049-821-2298  
† Equally contributed authors.

**Citation:** Cellini, A.; Visentin, A.; Arangio Febbo, M.; Vedovato, S.; Marinello, S.; Tiberio, I.; Trentin, L.; Gurrieri, C. A Case of Hemophagocytic Lymphohistiocytosis Triggered by Disseminated Tuberculosis and Hairy Cell Leukemia after SARS-CoV2 Infection. *Appl. Sci.* **2022**, *12*, 564. <https://doi.org/10.3390/app12020564>

Academic Editor: Livio Trentin

Received: 3 November 2021

Accepted: 5 January 2022

Published: 7 January 2022

**Publisher's Note:** MDPI stays neutral with regard to jurisdictional claims in published maps and institutional affiliations.

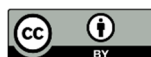

**Copyright:** © 2022 by the authors. Licensee MDPI, Basel, Switzerland. This article is an open access article distributed under the terms and conditions of the Creative Commons Attribution (CC BY) license (<https://creativecommons.org/licenses/by/4.0/>).

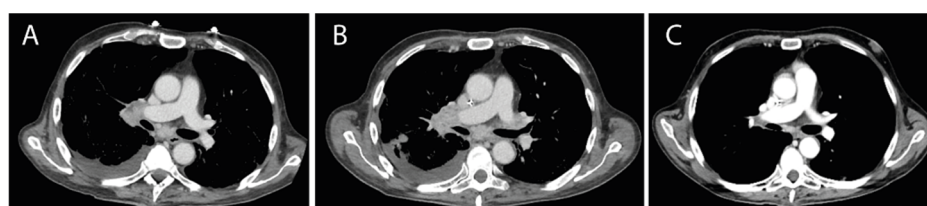

**Figure S1.** Side by side comparison of right hilar and subcarinal lymphadenomegaly at different time-points: start of anti-tubercular therapy (Panel A), after two months of therapy when immune reconstitution syndrome was suspected (Panel B), and after discharge (panel C).

**Figure S1.** Thoracic CT scans before and after the start of antitubercular therapy.
